# Supplementary material for: Exfoliation of amorphous phthalocyanine conjugated polymers into ultrathin nanosheets for highly efficient oxygen reduction
Source: Royal Society of Chemistry journal article supplement (doi:10.1039/c8ta11044a), 2019-01-01
Supplement: c8ta11044a1.pdf [file c8ta11044a1.pdf]

## Electronic Supplementary Information

### **Exfoliation of Amorphous Phthalocyanine Conjugated Polymers into Ultrathin Nanosheets for Highly Efficient Oxygen Reduction**

**Wenping Liu, Chiming Wang, Lijie Zhang, Houhe Pan, Wenbo Liu, Jun Chen,  
Dongjiang Yang, Yanjuan Xiang, Kang Wang,\* Jianzhuang Jiang,\* and Xiangdong  
Yao\***

## Experimental Section

AFM images were recorded from a Bruker Multimode 8 system with a silicon cantilever by using tapping mode. All AFM images are shown in height mode without any image processing except flatting. Transmission electron microscopy (TEM) was measured by HT7700 electron microscope at 100 KV. HAADF-STEM images and energy dispersive spectroscopy (EDS) mapping images were taken on a JEM-ARM200F electron microscope operated at 200 kV. AC STEM images were collected from TECNAI 12 and probe-corrected JEOL ARM200F with an acceleration voltage of 80 kV. Solid-state UV-Vis diffuse reflectance spectra were recorded on an SHIMADZU UV-2600 spectrophotometer. IR spectra were recorded as KBr pellets using a Bruker Tensor 37 spectrometer with  $2\text{ cm}^{-1}$  resolution. X-ray photoelectron spectra (XPS) data were collected from PHI 5300 ESCA System (PerkinElmer, USA).  $\text{N}_2$  adsorption-desorption isotherms were measured on a QuadraSorb SI apparatus at 77 K and the surface areas were calculated by the Brunauer Emmette Teller (BET) method. CV, LSV, and RRDE measurements were conducted on the CHI 760E workstation (CH Instruments, Inc.) with a RRDE-3A rotator (ALS Co., Ltd). The typical three-electrode system was employed to evaluate the electrochemical properties of the prepared catalysts. A typical three-electrode system was employed, using a commercial glassy carbon (GC) electrode (4 mm diameter,  $0.1256\text{ cm}^2$ ) as the working electrode, a platinum wire and Ag/AgCl electrode (in saturated KCl solution) as the counter and reference electrodes, respectively. All potentials were referred to the reversible hydrogen electrode by adding a value of  $(0.197 + 0.059 \times \text{pH})\text{ V}$ . All the electrochemical tests in this study were conducted at least three

times to ensure the accuracy of the measurement. Besides, the iR correction was applied to get rid of the influence of the Ohmic resistance, and the effect of the double layer capacitance on the ORR performance of the resulting catalysts was eliminated (the corresponding methods were specified in Supporting Information).

**Synthesis of FePc-CP-3.** FePc-CP-3 was prepared *via* a solid-state chemical reaction method. The mixture of 1,2,4,5-benzenetetranirole (50 mg, 0.28 mmol) and FeCl<sub>2</sub> (17.8 mg, 0.14 mmol) is ground evenly. Then the mixture was heated in a tube furnace in a nitrogen atmosphere. After carrying out the reaction at 250°C for an hour, the mixture was cooled down to room temperature, and then washed with 1 M hydrochloric acid, distilled water, methanol, and dichloromethane. Finally the product was dried at 80°C under vacuum for 12 h to yield FePc-CP-3 as a dark green powder (55mg).

**Preparation of FePc-CP NS@G.** A designed volume (2.0 mg mL<sup>-1</sup>) of the exfoliated FePc-CP NSs was added drop by drop into graphene NSs suspension with concentration of 1.0 mg mL<sup>-1</sup> under continuous stirring for 8 h at 70°C. The flocculated product was separated by centrifugation. The weight ratio of FePc-CP NS and G was controlled as 2:1.

**Preparation of CoPc-CP NS@G.** A designed volume (2.0 mg mL<sup>-1</sup>) of the exfoliated FePc-CP NSs was added drop by drop into graphene NSs suspension with concentration of 1.0 mg mL<sup>-1</sup> under continuous stirring for 8 h at 70°C. The flocculated product was separated by centrifugation. The weight ratio of FePc-CP NS and G was controlled as 2:1.

**Preparation of the working electrode:** The catalyst-modified working electrode was fabricated by casting an appropriate amount of catalyst ink, which was obtained by ultrasonically dispersing the catalyst (4 mg) into 1.0 mL ethanol containing 0.2  $\mu\text{L}$  5wt% Nafion. Then, 8  $\mu\text{L}$  of the mixture was dropped onto a polished glassy carbon electrode (4 mm in diameter). The loaded electrode was placed in a 60  $^{\circ}\text{C}$  oven for 10 min to dry and then was taken out to cool down before all the tests. The loading amount of each catalyst was kept at 0.25  $\text{mg cm}^{-2}$ .

**Cyclic voltammetry (CV).** Prior to the test, the electrolyte (0.1 M KOH solution) was bubbled with  $\text{O}_2$  for at least 30 min to make it saturated with  $\text{O}_2$ , and a constant oxygen flow was kept during the measurement. The data was recorded at the scan rate of 50  $\text{mV s}^{-1}$  under static conditions when the system became stable. For the methanol tolerance test, after injecting 5 % (volume) methanol into the cell, the electrode was rotated for 5 min to ensure the added methanol dispersed homogeneously in the electrolyte, and then the CV measurement was carried out under static conditions again. The resulting data were corrected to remove the iR drop.

**Linear sweep voltammetry (LSV) measurement.** The rotating speed of the working electrode is increased from 400 to 2500 rpm at the scan rate of 10  $\text{mV s}^{-1}$ . The resulting data were corrected to remove the iR drop and the double-layer effect.

**Rotating ring-disk electrode (RRDE) measurement.** The rotating speed of the working electrode was fixed at 1600 rpm with the scan rate of 10  $\text{mV s}^{-1}$  for the RRDE test. The

electron transfer number ( $n$ ) is calculated *via* the following equation.<sup>S1,S2</sup>

$$n = 4I_d / (I_d + I_r / N) \quad (1)$$

$$\% HO^{2-} = 200(I_r / N) / (I_d + I_r / N) \quad (2)$$

Where  $I_d$  stands for the disk current,  $I_r$  represents the ring current, and  $N$  is the current collection efficiency of the Pt ring, which was identified to be 0.43 in 2 mmol L<sup>-1</sup> K<sub>3</sub>Fe[CN]<sub>6</sub> and 0.1 M KCl solution.

**Koutecky-Levich (K-L) plots.** The working electrode was scanned cathodically at the rate of 10 mV s<sup>-1</sup> with the rotation speed from 400 to 2500 rpm. Koutecky-Levich (K-L) plots ( $J^{-1}$  vs  $\omega^{-1/2}$ ) were analyzed at 0.3–0.6 V. Koutecky-Levich equation:<sup>S3,S4</sup>

$$1/J = 1/J_L + 1/J_K = 1/(B\omega^{1/2}) + 1/J_K \quad (3)$$

$$B = 0.2nFC_0D_0^{2/3}\nu^{-1/6}; J_K = nFkC_0$$

Where  $J$  is the measured current density,  $J_k$  and  $J_L$  are the kinetic and limiting current densities,  $\omega$  is the angular velocity,  $n$  is transferred electron number,  $F$  (96485 C mol<sup>-1</sup>) is the Faraday constant,  $D_0$  is the diffusion coefficient of O<sub>2</sub> in 0.1 M KOH ( $1.9 \times 10^{-5}$  cm<sup>2</sup> s<sup>-1</sup>),  $C_0$  is the bulk concentration of O<sub>2</sub> ( $1.2 \times 10^{-6}$  mol cm<sup>-3</sup>),  $\nu$  is the kinetic viscosity of the electrolyte (0.01 cm<sup>2</sup> s<sup>-1</sup>), and  $k$  is the electron-transfer rate constant. The constant 0.2 is adopted when the rotation speed is expressed in rpm.

**iR-Correction.** The iR correction has been adopted to remove the influence of Ohmic resistance on the ORR measurements. Specifically, the electrochemical alternating current impedance spectroscopy (EIS) was utilized to measure to Ohmic resistance under the ORR conditions. The potentials were calculated *via* the following equation:<sup>S5</sup>

$$E_{iR\text{-corrected}} = E - iR \quad (4)$$

Where  $i$  is the current,  $R$  is the uncompensated ohmic electrolyte resistance measured *via* high frequency A.C. impedance in O<sub>2</sub>-saturated 0.1 M KOH solution, which is around 50  $\Omega$  for all the tested samples.

**Double-Layer Capacitance Correction.** The ORR test was conducted in ultra-high purity nitrogen saturated and oxygen saturated 0.1 M KOH solution, respectively, and the final LSV data was obtained by subtracting the LSV data measured in N<sub>2</sub>-saturated 0.1 M KOH solution from the LSV results measured in O<sub>2</sub>-saturated 0.1 M KOH solution. All the LSV curves in this work have been corrected by this method.

**Mass Activity.** The mass activity was obtained by normalizing the kinetic current ( $I_k$ ) to the electrode mass.  $I_k$  is obtained by multiplying  $J_k$  (derived from the Koutecky–Levich equation at 0.9 V vs RHE) with the geometric area of the glassy carbon disk.

**Theoretical Calculation.** The interaction between the 4D<sub>4h</sub> model with all the nine structural models fabricated by four phthalocyanine molecules with D<sub>4h</sub> or D<sub>2h</sub> symmetry is calculated at the level of M06-2X-D3/6-311+G(d,p). Density functional theory (DFT) calculations for the Fe<sub>0.5</sub>Co<sub>0.5</sub>Pc-CP NS@G composite were performed on the basis of PBE. A mixed basis set, where Lanl2DZ for Fe/Co and 3-21g for C/N/H, was employed. All calculations were carried out by Gaussian 09 D.01 software package.<sup>S6-S9</sup>

**The calculation of turnover frequency (TOF).**

The TOF is calculated by following Equations,

$$TOF = \frac{N_{O_2 \text{ per unit area}}}{N_{\text{active site per unit area}}} \quad (5)$$

$$N_{O_2 \text{ per unit area}} = \frac{j}{4f} \quad (6)$$

$$N_{\text{active site per unit area}} = N_{\text{Fe and Co atoms}} = \frac{m_{Fe}}{M_{Fe}} + \frac{m_{Co}}{M_{Co}} \quad (7)$$

The F is Faraday constant, the j is current density,  $m_{Fe}$  and  $m_{Co}$  are the mass of Fe and Co per unit area and the  $M_{Fe}$  and  $M_{Co}$  are atomic mass of Fe and Co.

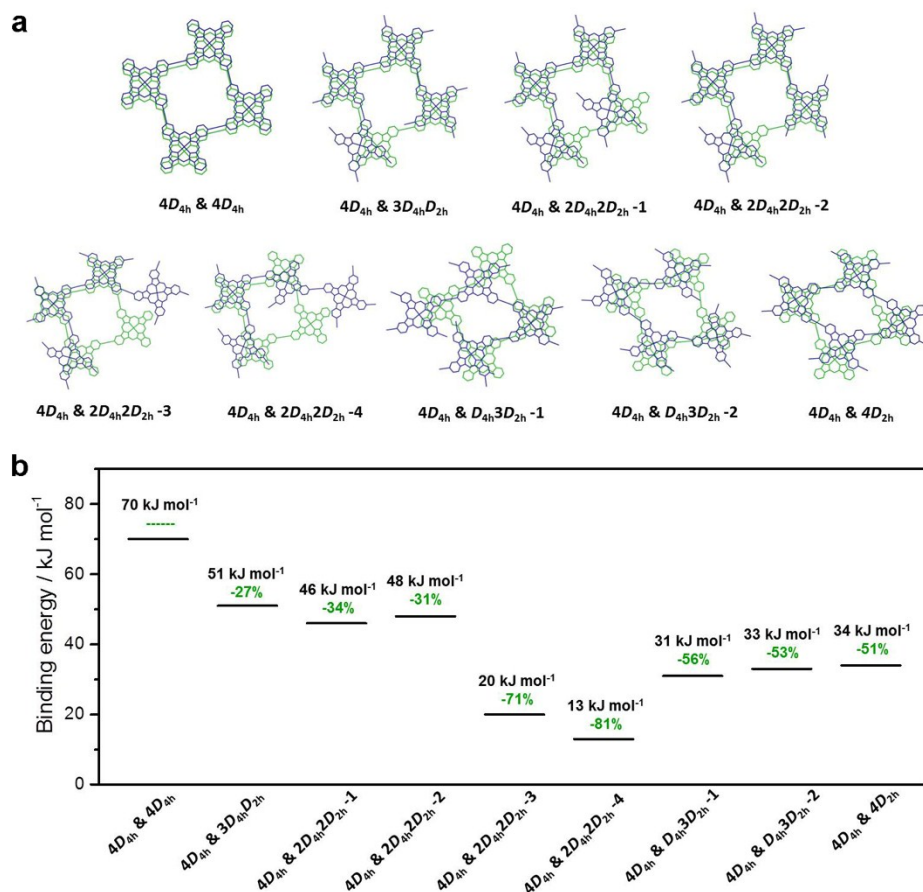

**Fig. S1.** (a) Schematic diagram for the  $\pi$ - $\pi$  interactions between the 4D<sub>4h</sub> model (green) with all the nine quadrilateral structural models fabricated by four phthalocyanine molecules with D<sub>4h</sub> or D<sub>2h</sub> symmetry (blue) and (b) the corresponding binding energy per phthalocyanine molecule between two models.

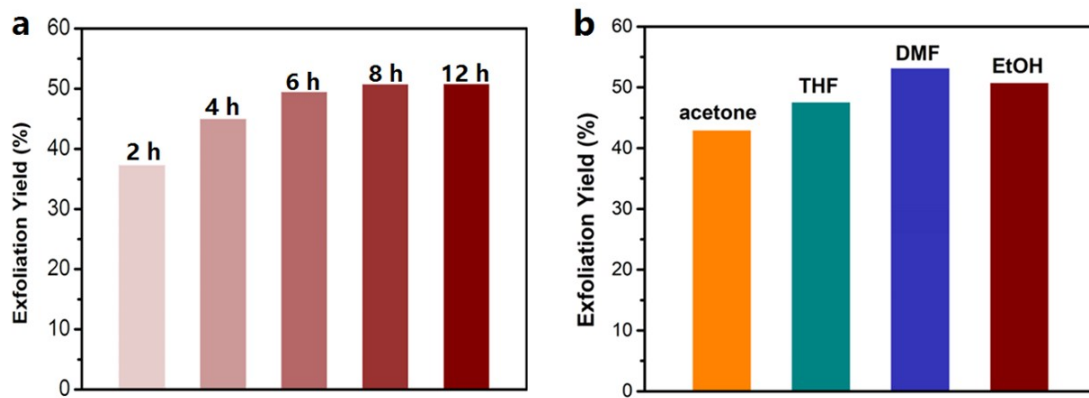

**Fig. S2** The ultrasonic exfoliation yield of  $\text{Fe}_{0.5}\text{Co}_{0.5}\text{Pc-CP}$  NSs (a) in ethanol at different times and (b) in different organic solvents for 8 h.

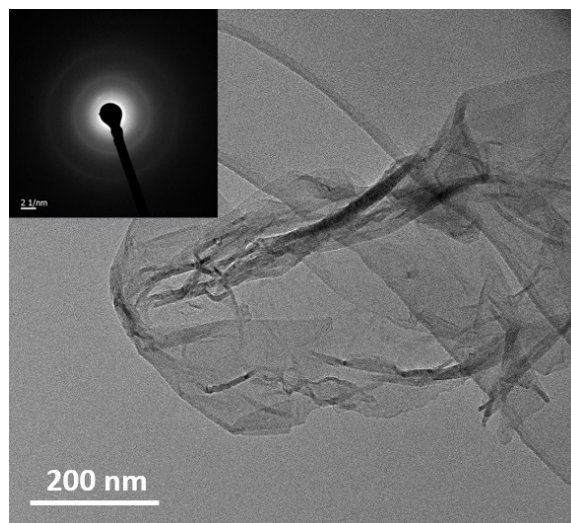

**Fig. S3** TEM image and SAED pattern of the Fe<sub>0.5</sub>Co<sub>0.5</sub>Pc-CP NSs.

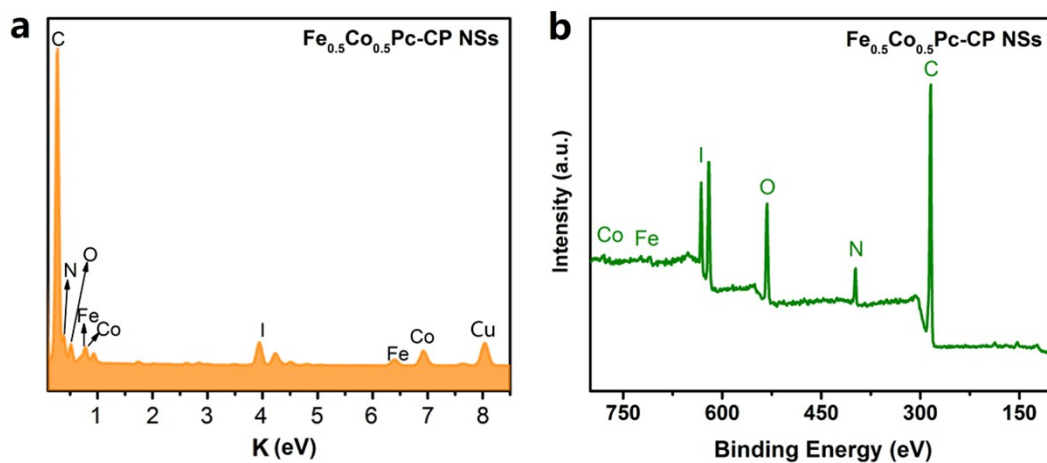

**Fig. S4** EDS (a) and XPS overall spectrum (b) of results of the  $\text{Fe}_{0.5}\text{Co}_{0.5}\text{Pc-CP NSs}$ .

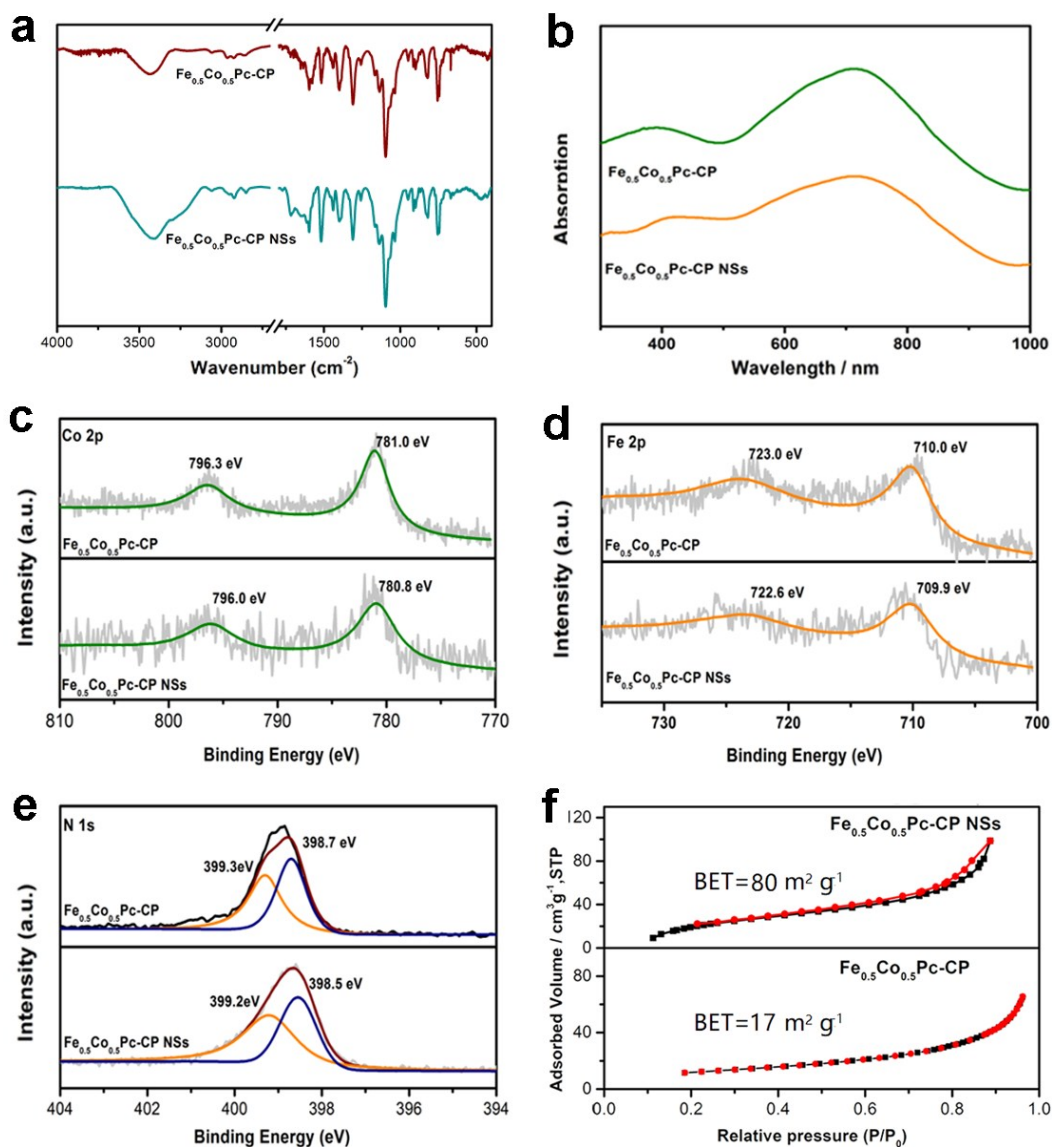

**Fig. S5** (a) FT-IR spectra of  $\text{Fe}_{0.5}\text{Co}_{0.5}\text{Pc-CP}$  and  $\text{Fe}_{0.5}\text{Co}_{0.5}\text{Pc-CP NSs}$  in the region of 400-4000  $\text{cm}^{-1}$ . (b) UV-vis diffuse reflectance spectra of  $\text{Fe}_{0.5}\text{Co}_{0.5}\text{Pc-CP}$  and  $\text{Fe}_{0.5}\text{Co}_{0.5}\text{Pc-CP NSs}$ . XPS high resolution (c) Co 2p, (d) Fe 2p and (e) N 1s spectra of  $\text{Fe}_{0.5}\text{Co}_{0.5}\text{Pc-CP}$  and  $\text{Fe}_{0.5}\text{Co}_{0.5}\text{Pc-CP NSs}$ . (f) The BET surface area of  $\text{Fe}_{0.5}\text{Co}_{0.5}\text{Pc-CP}$  and  $\text{Fe}_{0.5}\text{Co}_{0.5}\text{Pc-CP NSs}$ .

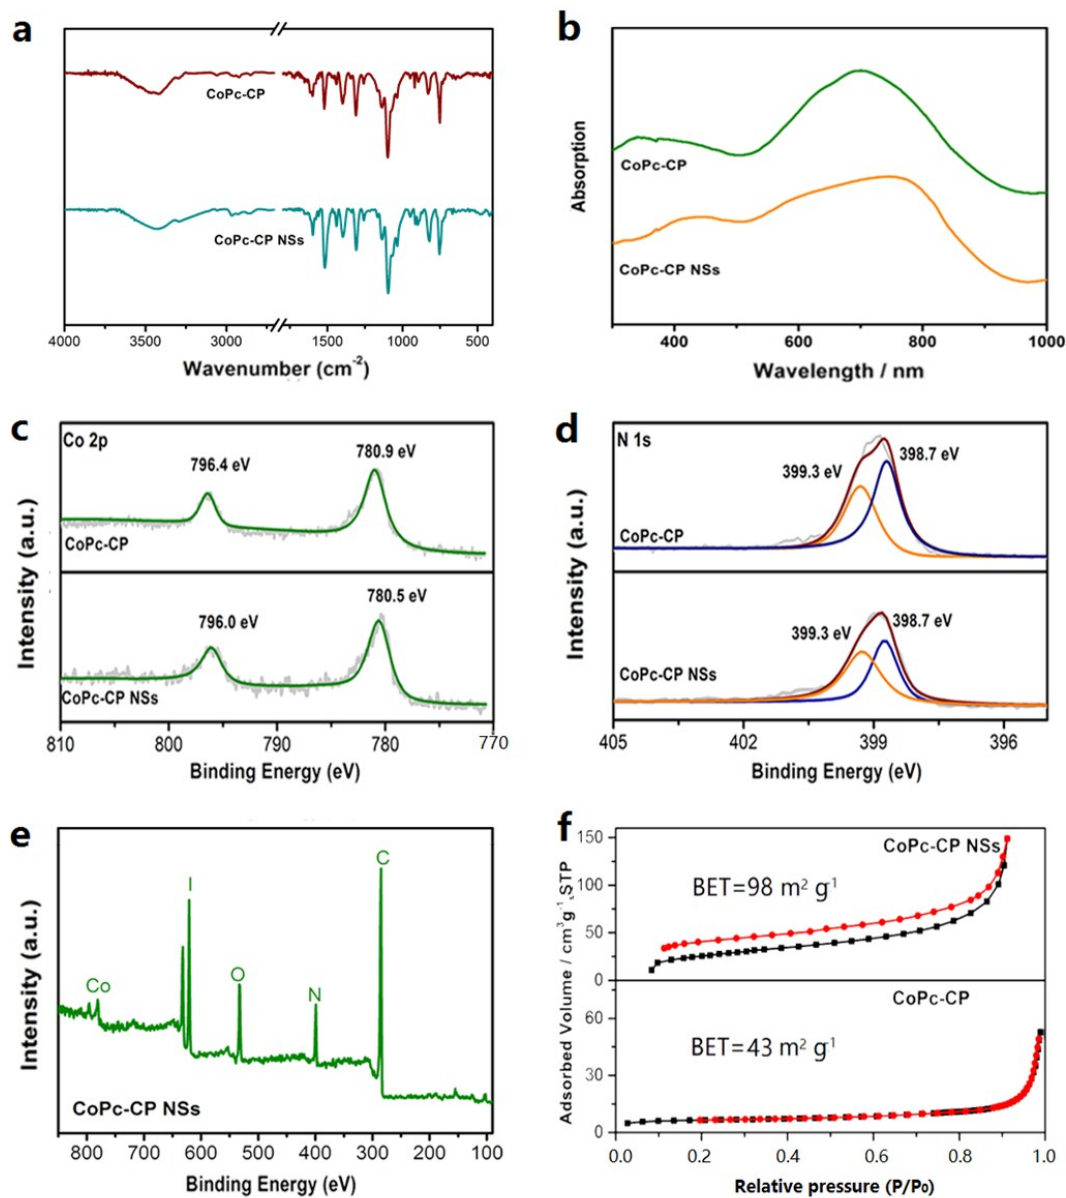

**Fig. S6** (a) FT-IR spectra of CoPc-CP and CoPc-CP NSs in the region of 400-4000  $\text{cm}^{-1}$ . (b) UV-vis diffuse reflectance spectra of CoPc-CP and CoPc-CP NSs. XPS high resolution (c) Co 2p, (d) N 1s and (e) overall spectra of CoPc-CP and CoPc-CP NSs. (f) The BET surface area of CoPc-CP and CoPc-CP NSs.

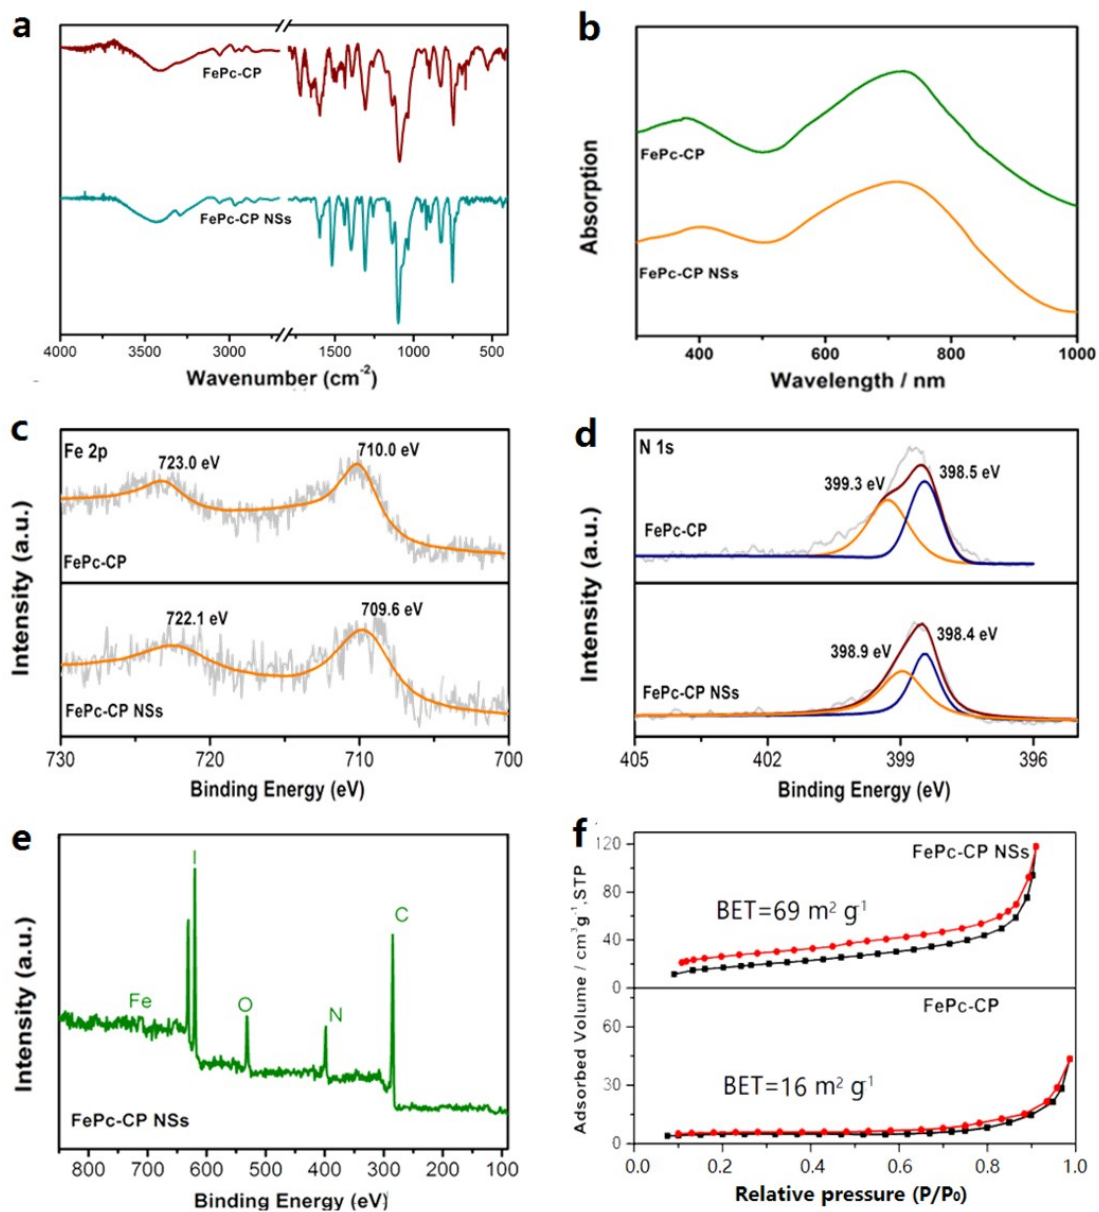

**Fig. S7** (a) FT-IR spectra of FePc-CP and FePc-CP NSs in the region of 400-4000  $\text{cm}^{-1}$ . (b) UV-vis diffuse reflectance spectra of FePc-CP and FePc-CP NSs. XPS high resolution (c) Fe 2p, (d) N 1s and (e) overall spectra of FePc-CP and FePc-CP NSs. (f) The BET surface area of FePc-CP and FePc-CP NSs.

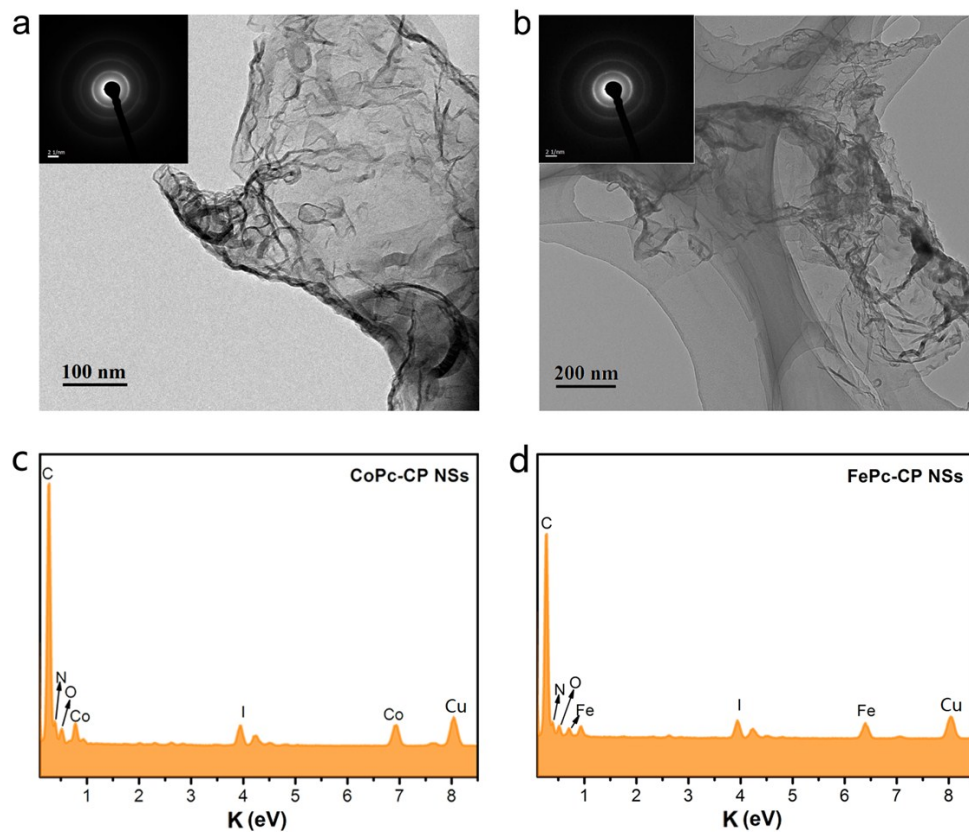

**Fig. S8** TEM images and SAED pattern of (a) CoPc-CP NSs and (b) FePc-CP NSs. EDS of (c) CoPc-CP NSs and (d) FePc-CP NSs.

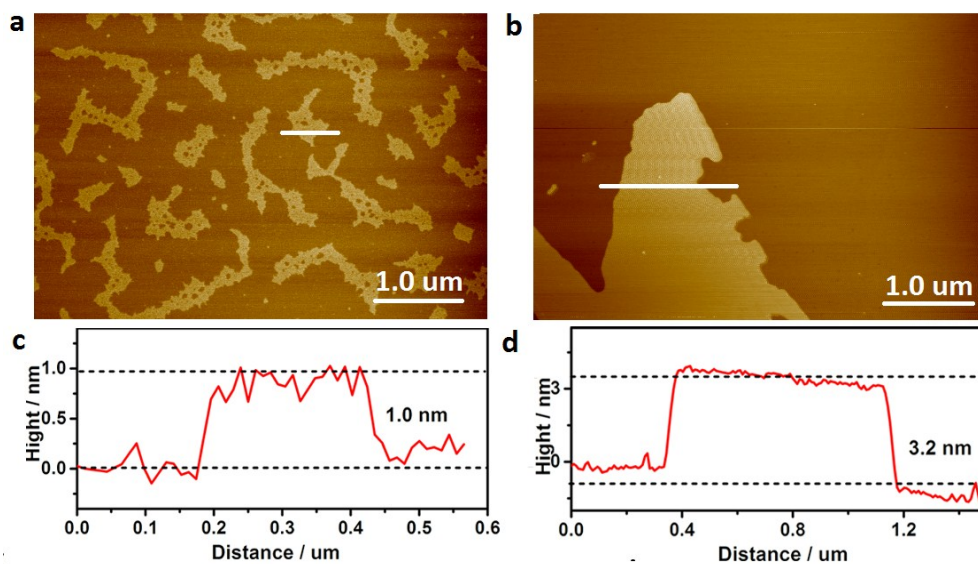

**Fig. S9** AFM image and the corresponding height profiles of (a, c) CoPc-CP NSs and (b, d) FePc-CP NSs.

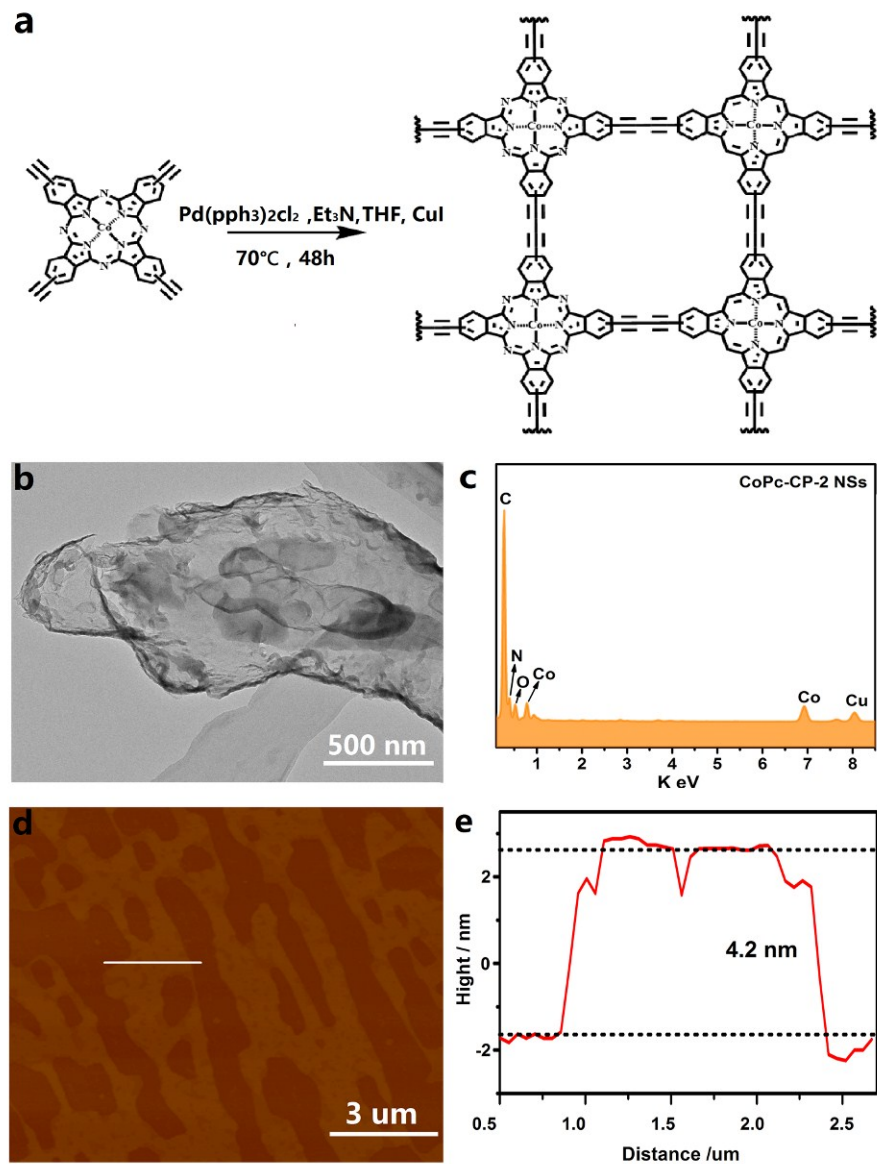

**Fig. S10** (a) Schematic diagram for the synthesis of the CoPc-CP-2. The TEM (b) and EDS (c) of CoPc-CP-2 NSs. AFM image (d) and the corresponding height profiles (e) of CoPc-CP-2 NSs.

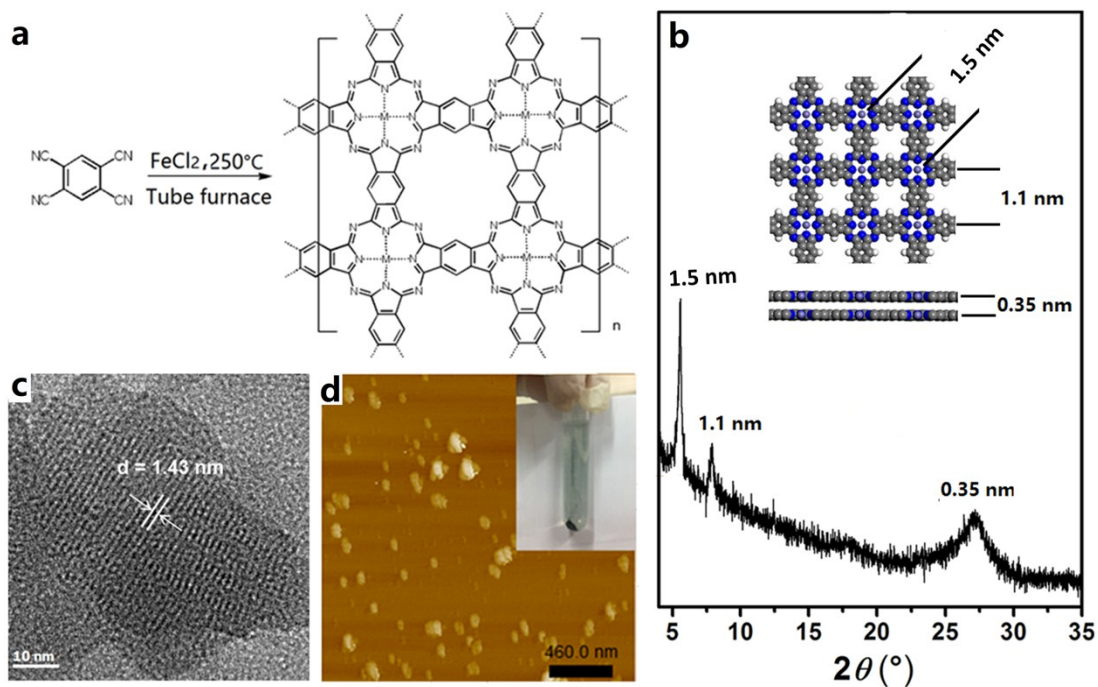

**Fig. S11** (a) Schematic diagram for the synthesis of the FePc-CP-3. (b) PXRD patterns of FePc-CP-3. Inset shows the top and side views of the structures of FePc-CP-3. (c) The HRTEM of FePc-CP-3. (d) AFM image of FePc-CP-3 after ultrasonic exfoliation for 8 h in ethanol. Inset: Photograph of the FePc-CP-3 after ultrasonic exfoliation.

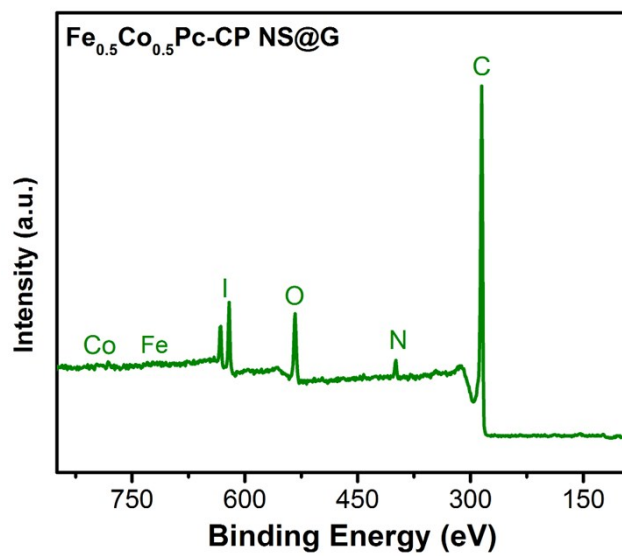

**Fig. S12** XPS overall spectra of  $\text{Fe}_{0.5}\text{Co}_{0.5}\text{Pc-CP NS@G}$

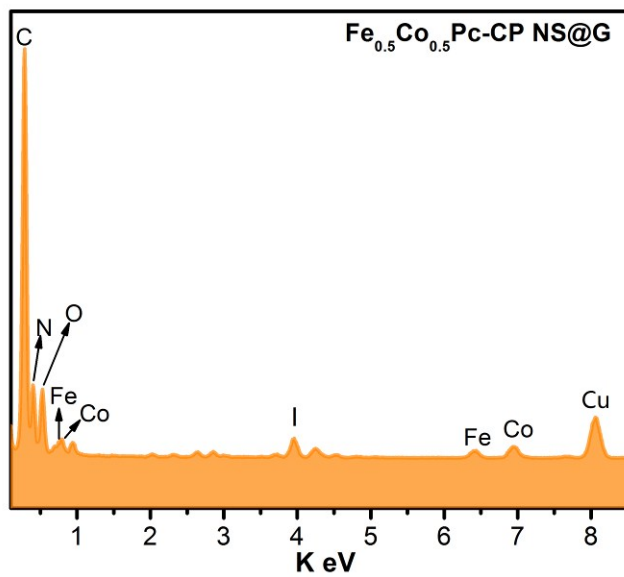

**Fig. S13** Energy dispersive spectroscopy (EDS) results of the  $\text{Fe}_{0.5}\text{Co}_{0.5}\text{Pc-CP NS@G}$ .

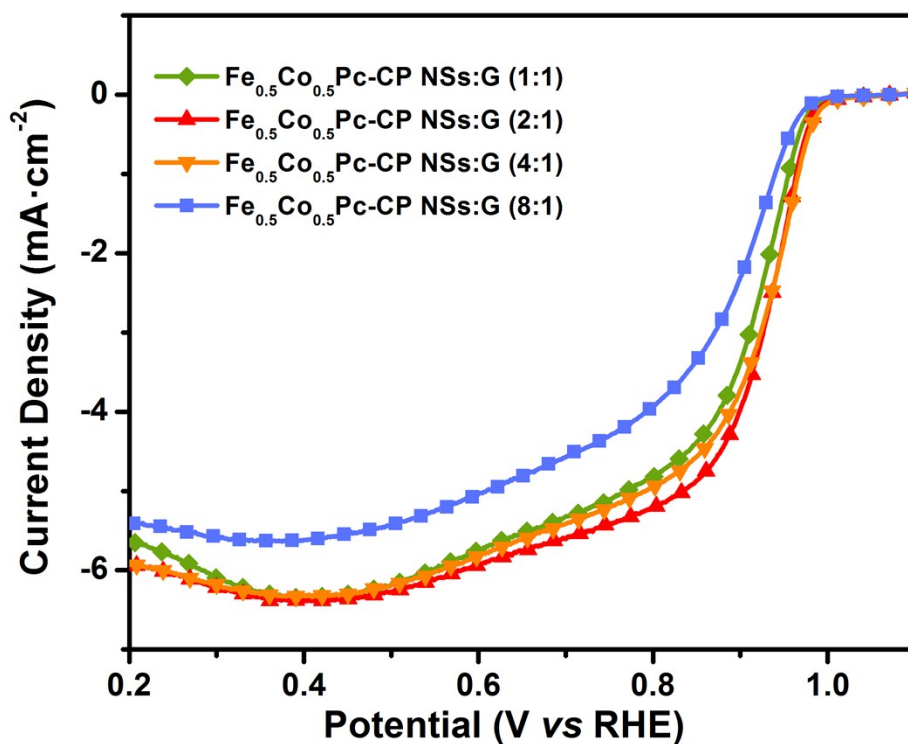

**Fig. S14.** LSV curves of  $\text{Fe}_{0.5}\text{Co}_{0.5}\text{Pc-CP NS@G}$  with the ratio between  $\text{Fe}_{0.5}\text{Co}_{0.5}\text{Pc-CP NS}$  and  $\text{G}$  of 1:1, 2:1, 4:1, and 8:1 (denoted as  $\text{Fe}_{0.5}\text{Co}_{0.5}\text{Pc-CP NS@G}$  (1:1),  $\text{Fe}_{0.5}\text{Co}_{0.5}\text{Pc-CP NS@G}$  (2:1),  $\text{Fe}_{0.5}\text{Co}_{0.5}\text{Pc-CP NS@G}$  (4:1), and  $\text{Fe}_{0.5}\text{Co}_{0.5}\text{Pc-CP NS@G}$  (8:1), respectively) at the scan rate of  $10 \text{ mV s}^{-1}$  with the rotation speed of 1600 rpm in  $\text{O}_2$ -saturated 0.1 M KOH solution.

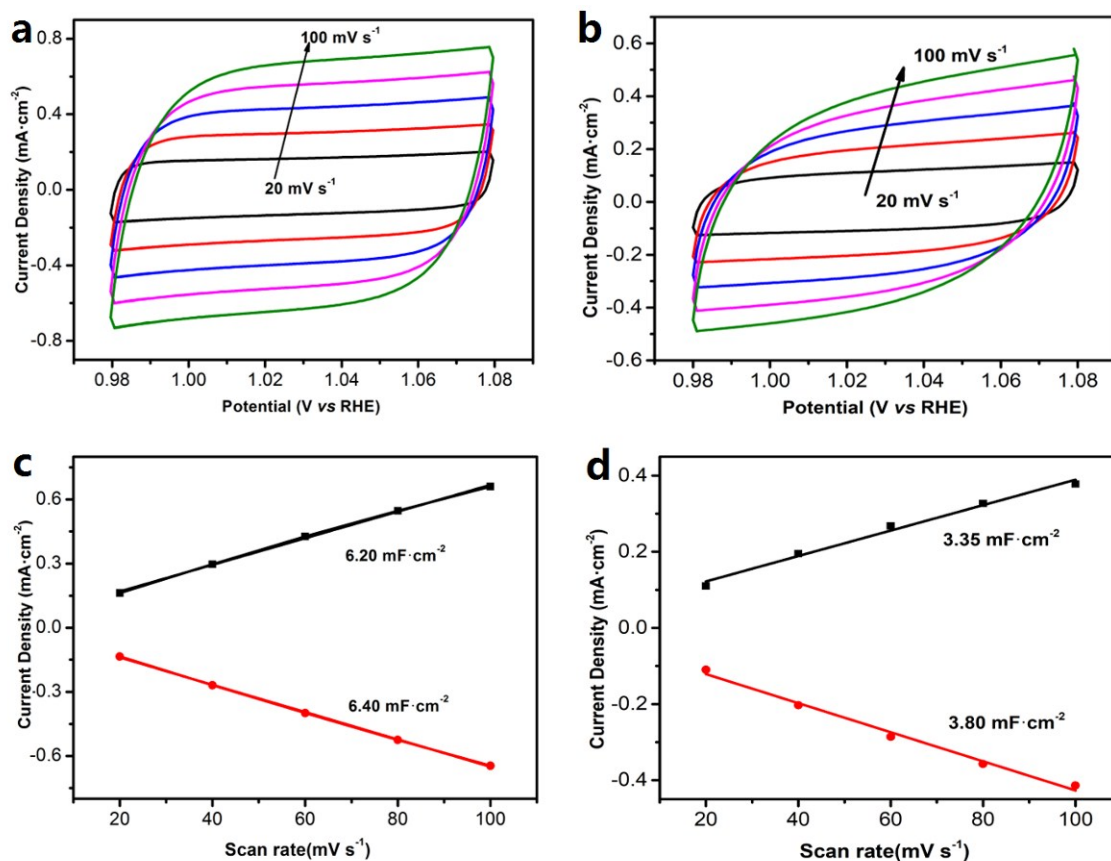

**Fig. S15** (a)(b) CV conducted at potential from 0.98 V to 1.08 V *vs* RHE at scan rates of 20 mV s<sup>-1</sup>, 40 mV s<sup>-1</sup>, 60 mV s<sup>-1</sup>, 80 mV s<sup>-1</sup>, and 100 mV s<sup>-1</sup> in 0.1 M KOH. (c)(d) The current densities of anode and cathode measured at 1.02 V *vs* RHE with different scan rates. (a)(c) and (b)(d) are Fe<sub>0.5</sub>Co<sub>0.5</sub>Pc-CP NS@G and Fe<sub>0.5</sub>Co<sub>0.5</sub>Pc-CP&G. respectively.

To study the electrochemically active surface area (ECSA) of Fe<sub>0.5</sub>Co<sub>0.5</sub>Pc-CP NS@G and Fe<sub>0.5</sub>Co<sub>0.5</sub>Pc-CP&G. we conducted the CV cycles at different scan rates during the potential from 0.98V to 1.08V *vs* RHE in 0.1 M KOH, where there is no Faradic current. At last, the ECSA was estimated from the as obtained double-layer capacitance ( $C_{dl}$ ). According to  $C_{dl}$  is constant, it can be calculated as:

$$C_{dl} = Q/U = (dQ/dt)/(dU/dt) = j/r \quad (8)$$

$Q$  is the quantity of electric charge per unit area,

$U$  is the voltage,

$j$  is the current density and

$r$  is the scan rate

From Eq(1), the  $C_{dl}$  is the slope of  $j \sim r$ , which can be obtained by the Fig. S15c and S15d. The average  $C_{dl}$  of  $Fe_{0.5}Co_{0.5}Pc-CP\ NS@G$  and  $Fe_{0.5}Co_{0.5}Pc-CP\ \&G$  are  $6.3\ mF/cm^2$ , and  $3.6\ mF/cm^2$ , respectively. The ECSA can be calculated as:

$$ECSA = C_{dl}/C_s \quad (9)$$

$C_s$  is the specific capacitance value for a flat standard with  $1\ cm^2$  of real surface area. The general value for  $C_s$  is between  $20\ \mu F/cm^2$  and  $60\ \mu F/cm^2$ . Here we use  $40\ \mu F/cm^2$  as the average value (*Nat. Commun.* **2015**, 6, 8668). Thus the ECSA for  $Fe_{0.5}Co_{0.5}Pc-CP\ NS@G$  and  $Fe_{0.5}Co_{0.5}Pc-CP\ \&G$  can be obtained as  $159\ cm^2$  and  $90\ cm^2$ , respectively.

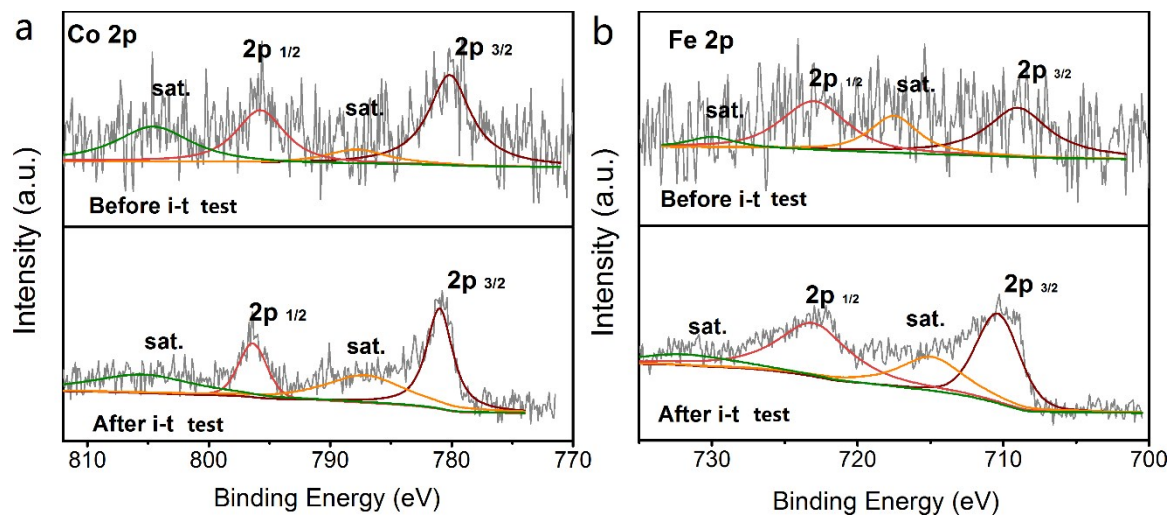

**Fig. S16.** XPS high resolution (a) Co 2p and (b) Fe 2p spectra of  $\text{Fe}_{0.5}\text{Co}_{0.5}\text{Pc-CP NS@G}$  before and after i-t test.

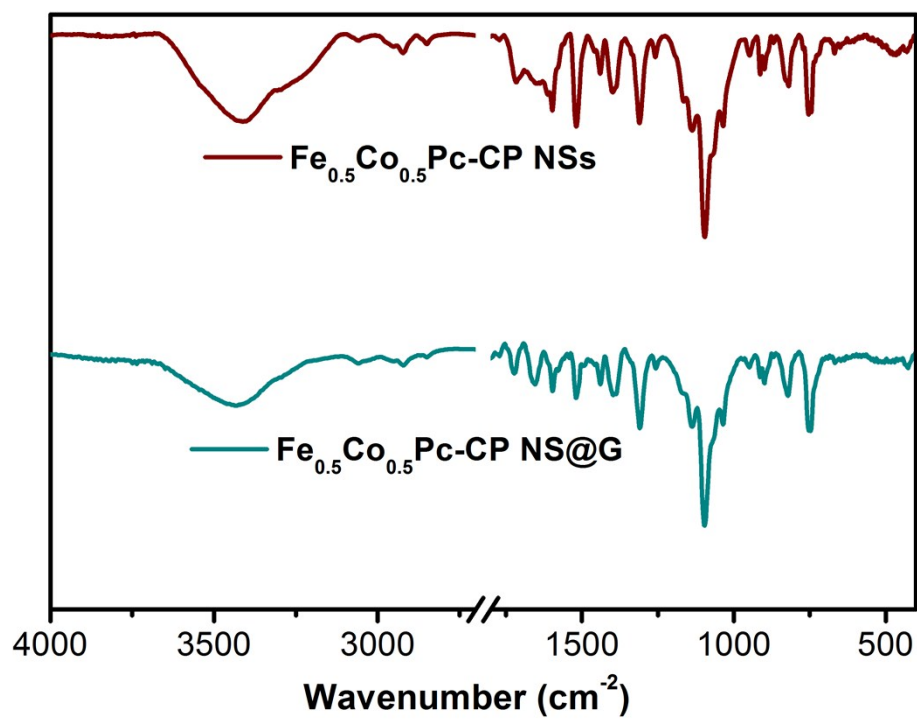

**Fig. S17.** FT-IR spectra of Fe<sub>0.5</sub>Co<sub>0.5</sub>Pc-CP NSs and Fe<sub>0.5</sub>Co<sub>0.5</sub>Pc-CP NS@G in the region of 400-4000 cm<sup>-1</sup>.

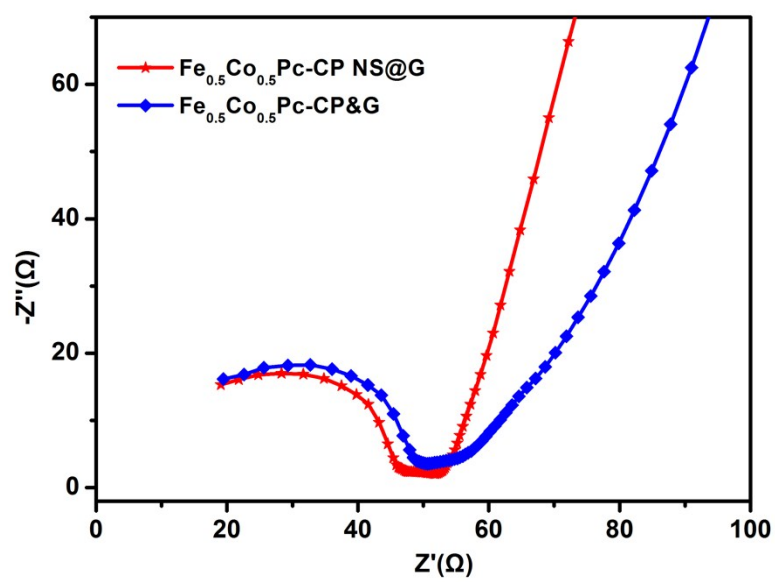

**Fig. S18.** Impedance curve of  $\text{Fe}_{0.5}\text{Co}_{0.5}\text{Pc-CP NS@G}$  and  $\text{Fe}_{0.5}\text{Co}_{0.5}\text{Pc-CP\&G}$ .

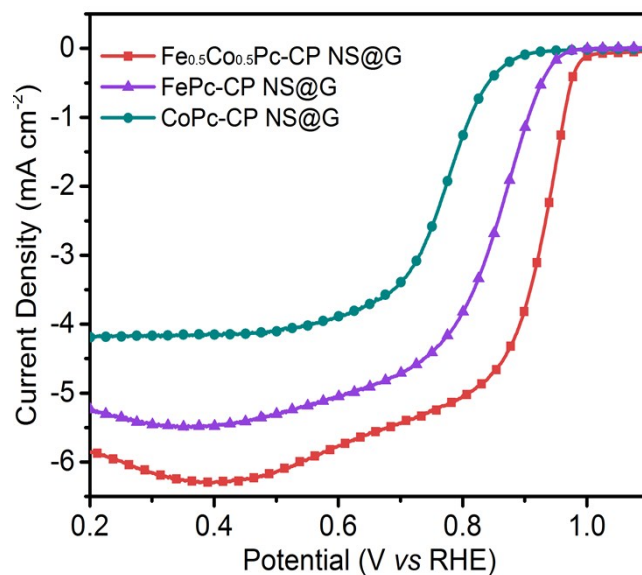

**Fig. S19.** LSV curves of Fe<sub>0.5</sub>Co<sub>0.5</sub>Pc-CP NS@G, FePc-CP NS@G, and CoPc-CP NS@G with the ratio between MPc-CP NS and G of 2:1 at the scan rate of 10 mV s<sup>-1</sup> with the rotation speed of 1600 rpm in O<sub>2</sub>-saturated 0.1 M KOH solution. It can be seen that the Fe<sub>0.5</sub>Co<sub>0.5</sub>Pc-CP NS@G exhibits much better ORR catalytic activity than the two single metal counterparts, suggesting the synergetic effect between the proximate Fe and Co ions in the conjugated network. This is well in line with the result found for the corresponding bulk materials as revealed in ref. S1

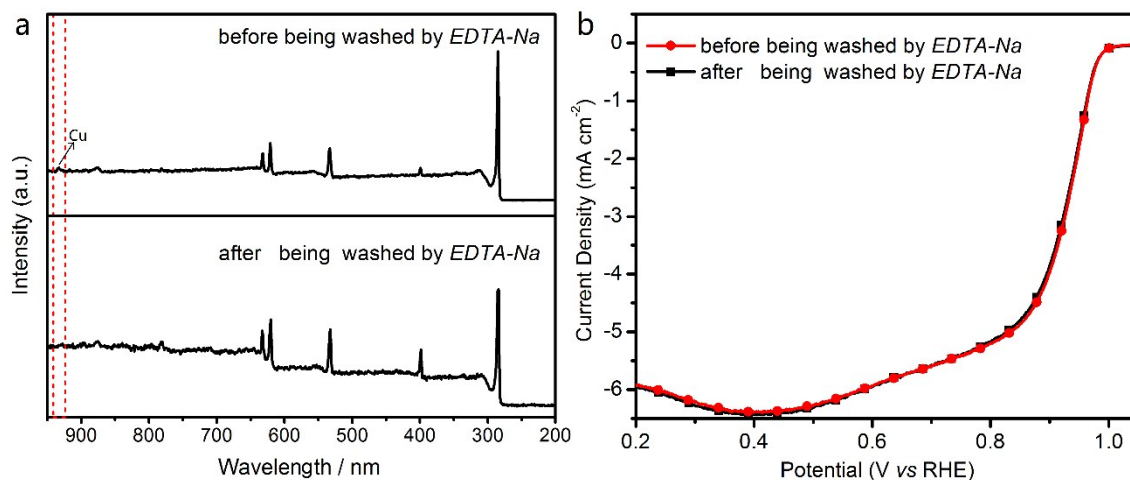

**Fig. S20.** (a) XPS overall spectra of  $\text{Fe}_{0.5}\text{Co}_{0.5}\text{Pc-CP NS@G}$  before and after being washed by EDTA-Na. (b) LSV curves of  $\text{Fe}_{0.5}\text{Co}_{0.5}\text{Pc-CP NS@G}$  before and after being washed by EDTA-Na at the scan rate of  $10 \text{ mV s}^{-1}$  with the rotation speed of 1600 rpm in  $\text{O}_2$ -saturated 0.1 M KOH solution.

In order to exclude the contribution to the catalytic activity from the Cu deposits, the  $\text{Fe}_{0.5}\text{Co}_{0.5}\text{Pc-CP NS@G}$  was also washed by EDTA-Na solution, and the content of Cu in the washed  $\text{Fe}_{0.5}\text{Co}_{0.5}\text{Pc-CP NS@G}$  was tested by XPS. As shown in Fig. S20a in the revised ESI and given below, the signals for Cu almost disappear, proving that the Cu residue was removed. Nevertheless, the ORR properties of the  $\text{Fe}_{0.5}\text{Co}_{0.5}\text{Pc-CP NS@G}$  before and after being washed by EDTA-Na are just the same (see Fig. S20b), which excludes the contribution to the catalytic activity from the Cu deposits.

**Table S1.** Comparison of ORR electrocatalytic performance of various nonprecious metal catalysts in 0.1 M KOH.

| Catalyst                                             | Rotation and scan rate             | Onset potential (V vs RHE) | Half-wave potential (V vs RHE) | Reference |
|------------------------------------------------------|------------------------------------|----------------------------|--------------------------------|-----------|
| Fe <sub>0.5</sub> Co <sub>0.5</sub> Pc-CP NS@G       | 1600 rpm and 10 mV s <sup>-1</sup> | 1.006 V                    | 0.927                          | This work |
| Fe <sub>0.5</sub> Co <sub>0.5</sub> Pc-CP&G          | 1600 rpm and 10 mV s <sup>-1</sup> | 0.954                      | 0.855                          | This work |
| D-AC@2Mn-4Co                                         | 1600 rpm and 10 mV s <sup>-1</sup> | 0.883 V                    | 0.803                          | [S10]     |
| NCNTFs                                               | 1600 rpm and 10 mV s <sup>-1</sup> | 0.97                       | 0.87                           | [S11]     |
| Co-C <sub>3</sub> N <sub>4</sub> /CNT                | 1600 rpm and 10 mV s <sup>-1</sup> | 0.9                        | —                              | [S12]     |
| Fe <sub>3</sub> C@N-CNT                              | 1600 rpm and 10 mV s <sup>-1</sup> | —                          | 0.85                           | [S13]     |
| Co <sub>3</sub> FeS <sub>1.5</sub> (OH) <sub>6</sub> | 1600 rpm and 10 mV s <sup>-1</sup> | 0.867                      | 0.721                          | [S14]     |
| Fe-N-CNTAs-5-900                                     | 1600 rpm and 10 mV s <sup>-1</sup> | 0.97                       | 0.88                           | [S15]     |
| FeCl <sub>11</sub> N <sub>4</sub> /CNS               | 1600 rpm and 10 mV s <sup>-1</sup> | —                          | 0.921                          | [S16]     |
| (Fe,Mn)-N-C                                          | 1600 rpm and 10 mV s <sup>-1</sup> | 0.98                       | 0.900                          | [S17]     |
| Fe-ISAs/CN                                           | 1600 rpm and 10 mV s <sup>-1</sup> | —                          | 0.9                            | [S18]     |
| GL-Fe/Fe <sub>5</sub> C <sub>2</sub> /NG-800         | 1600 rpm and 10 mV s <sup>-1</sup> | 0.98                       | 0.86                           | [S19]     |
| CNT/PC                                               | 1600 rpm and 10 mV s <sup>-1</sup> | —                          | 0.88                           | [S20]     |
| pCNT@Fe <sub>1.5</sub> @GL                           | 1600 rpm and 5 mV s <sup>-1</sup>  | 0.936                      | 0.883                          | [S21]     |
| Co SAs/N-C(900)                                      | 1600 rpm and 10 mV s <sup>-1</sup> | 0.982                      | 0.881                          | [S22]     |
| S,N-Fe/N/C-CNT                                       | 1600 rpm and 10 mV s <sup>-1</sup> | —                          | 0.85                           | [S23]     |
| Co@MCM                                               | 1600 rpm and 10 mV s <sup>-1</sup> | 0.95 V                     | 0.86                           | [S24]     |

## References

- [S1] W. Liu, Y. Hou, H. Pan, W. Liu, D. Qi, K. Wang, J. Jiang and X. Yao, *J. Mater. Chem. A*, 2018, **6**, 8349-8357.
- [S2] Y. Liang, Y. Li, H. Wang, J. Zhou, J. Wang, T. Regier and H. Dai, *Nat. Mater.*, 2011, **10**, 780-786.
- [S3] Y. Liang, H. Wang, J. Zhou, Y. Li, J. Wang, T. Regier and H. Dai, *J. Am. Chem. Soc.*, 2012, **134**, 3517-3523.
- [S4] S. Wang, D. Yu, L. Dai, D. Chang and J.-B. Baek, *ACS Nano*, 2011, **5**, 6202-6209.
- [S5] Y. Zhu, W. Zhou, Z. Chen, Y. Chen, C. Su, O. M. Tadé and Z. Shao, *Angew. Chem., Int. Ed.*, 2015, **54**, 3897-3901.
- [S6] P. Perdew, K. Burke and M. Ernzerhof, *Phys. Rev. Lett.*, 1996, **77**, 3865-3868.
- [S7] P. Hay and W. Wadt, *J. Chem. Phys.*, 1985, **82**, 270-283.
- [S8] J. Binkley, J. Pople and W. Hehre, *J. Am. Chem. Soc.*, 1980, **102**, 939-947.
- [S9] M. J. Frisch, et al. Gaussian 09, Revision D.01. Wallingford, CT: Gaussian Inc.; 2013.
- [S10] X. Yan, Y. Jia, J. Chen, Z. Zhu and X. Yao, *Adv. Mater.*, 2016, **28**, 8771-8778.
- [S11] B. Xia, Y. Yan, N. Li, H. Wu, X. Lou and X. Wang, *Nature Energy*, 2016, **1**, 8.
- [S12] Y. Zheng, Y. Jiao, Y. Zhu, Q. Cai, A. Vasileff, L. Li, Y. Han, Y. Chen and S. Qiao, *J. Am. Chem. Soc.*, 2017, **139**, 3336-3339.
- [S13] B. Guan, L. Yu and X. Lou, *Energy Environ. Sci.*, 2016, **9**, 3092-3096.
- [S14] H. Wang, C. Tang, B. Wang, B. Li and Q. Zhang, *Adv. Mater.*, 2017, **29**, 1702327.
- [S15] C. Zhu, S. Fu, J. Song, Q. Shi, D. Su, M. Engelhard, X. Li, D. Xiao, D. Li, L. Esteez, D. Du and Y. Lin, *Small*, 2017, **13**, 1603407.

- [S16] Y. Han, Y. Wang, R. Xu, W. Chen, L. Zheng, A. Han, Y. Zhu, J. Zhang, H. Zhang, J. Luo, C. Chen, Q. Peng, D. Wang and Y. Li, *Energy Environ. Sci.*, 2018, **11**, 2348-2352.
- [S17] N. Sahraie, U. Kramm, J. Steinberg, Y. Zhang, A. Thomas, T. Reier, J. P. Paraknowitsch and P. Strasser, *Nat. Commun.*, 2015, **6**, 8618.
- [S18] Y. Chen, S. Ji, Y. Wang, J. Dong, W. Chen, Z. Li, R. Shen, L. Zheng, Z. Zhuang, D. Wang and Y. Li, *Angew. Chem., Int. Ed.*, 2017, **56**, 6937-6941.
- [S19] X. Tian, L. Wang, B. Chi, Y. Xu, S. Zaman, K. Qi, H. Liu, S. Liao and B. Xia, *ACS Catal.*, 2018, **8**, 8970-8975.
- [S20] Y. J. Sa, D. J. Seo, J. Woo, J. T. Lim, J. Y. Cheon, S. Y. Yang, J. M. Lee, D. Kang, T. J. Shin, H. S. Shin, H. Y. Jeong, C. S. Kim, M. G. Kim, T. Y. Kim and S. H. Joo, *J. Am. Chem. Soc.*, 2016, **138**, 15046-15056.
- [S21] S. H. Ahn, X. W. Yu and A. Manthiram, *Adv. Mater.*, 2017, **29**, 1606534.
- [S22] P. Yin, T. Yao, Y. Wu, L. Zheng, Y. Lin, W. Liu, H. Ju, J. Zhu, X. Hong, Z. Deng, G. Zhou, S. Wei and Y. Li, *Angew. Chem., Int. Ed.*, 2016, **55**, 10800-10805.
- [S23] P. Chen, T. Zhou, L. Xing, K. Xu, Y. Tong, H. Xie, L. Zhang, W. Yan, W. Chu, C. Wu and Y. Xie, *Angew. Chem., Int. Ed.*, 2017, **56**, 610-614.
- [S24] H. Zhang, W. Zhou, T. Chen, B. Guan, Z. Li and X. Lou, *Energy Environ. Sci.*, 2018, **11**, 1980-1984.
